# Supplementary material
Source: publisher figshare collection journal article supplement (https://karger.figshare.com/ndownloader/files/23288429)
Supplement: Supplementary file 1 [file 23288429]

**Supplementary Appendix 2. PUBMED Search Criteria**

("renal insufficiency, chronic"[MeSH Terms] OR ("renal"[All Fields] AND "insufficiency"[All Fields] AND "chronic"[All Fields]) OR "chronic renal insufficiency"[All Fields] OR ("chronic"[All Fields] AND "kidney"[All Fields] AND "disease"[All Fields]) OR "chronic kidney disease"[All Fields]) OR ("kidney failure, chronic"[MeSH Terms] OR ("kidney"[All Fields] AND "failure"[All Fields] AND "chronic"[All Fields]) OR "chronic kidney failure"[All Fields] OR ("chronic"[All Fields] AND "renal"[All Fields] AND "failure"[All Fields]) OR "chronic renal failure"[All Fields]) OR ("intermittent claudication"[MeSH Terms] OR ("intermittent"[All Fields] AND "claudication"[All Fields]) OR "intermittent claudication"[All Fields] OR "claudication"[All Fields]) OR claudicant[All Fields] OR (critical[All Fields] AND ("extremities"[MeSH Terms] OR "extremities"[All Fields] OR "limb"[All Fields]) AND ("ischemia"[All Fields] OR "ischemia"[MeSH Terms] OR "ischemia"[All Fields])) OR (("extremities"[MeSH Terms] OR "extremities"[All Fields] OR "limb"[All Fields]) AND ("ischemia"[All Fields] OR "ischemia"[MeSH Terms] OR "ischemia"[All Fields])) OR (critical[All Fields] AND ("ischemia"[All Fields] OR "ischemia"[MeSH Terms] OR "ischemia"[All Fields])) OR ("kidney failure, chronic"[MeSH Terms] OR ("kidney"[All Fields] AND "failure"[All Fields] AND "chronic"[All Fields]) OR "chronic kidney failure"[All Fields] OR ("end"[All Fields] AND "stage"[All Fields] AND "renal"[All Fields] AND "disease"[All Fields]) OR "end stage renal disease"[All Fields]) OR ("kidney failure, chronic"[MeSH Terms] OR ("kidney"[All Fields] AND "failure"[All Fields] AND "chronic"[All Fields]) OR "chronic kidney failure"[All Fields] OR "esrd"[All Fields]) OR ("peripheral arterial disease"[MeSH Terms] OR ("peripheral"[All Fields] AND "arterial"[All Fields] AND "disease"[All Fields]) OR "peripheral arterial disease"[All Fields]) OR ("peripheral arterial disease"[MeSH Terms] OR ("peripheral"[All Fields] AND "arterial"[All Fields] AND "disease"[All Fields]) OR "peripheral arterial disease"[All Fields] OR ("peripheral"[All Fields] AND "artery"[All Fields] AND "disease"[All Fields]) OR "peripheral artery disease"[All Fields]) OR ("peripheral vascular diseases"[MeSH Terms] OR ("peripheral"[All Fields] AND "vascular"[All Fields] AND "diseases"[All Fields]) OR "peripheral vascular diseases"[All Fields] OR ("peripheral"[All Fields] AND "vascular"[All Fields] AND "disease"[All Fields]) OR "peripheral vascular disease"[All Fields]) OR ("hemodialysis"[All Fields] OR "renal dialysis"[MeSH Terms] OR ("renal"[All Fields] AND "dialysis"[All Fields]) OR "renal dialysis"[All Fields] OR "hemodialysis"[All Fields]) OR (endovascular[All Fields] AND ("methods"[MeSH Terms] OR "methods"[All Fields] OR "intervention"[All Fields])) OR (bypass[All Fields] AND surgery,[All Fields]) OR (bypass[All Fields] AND ("transplants"[MeSH Terms] OR "transplants"[All Fields] OR "graft"[All Fields])) OR (bypass[All Fields] AND ("transplantation"[Subheading] OR "transplantation"[All Fields] OR "grafting"[All Fields] OR "transplantation"[MeSH Terms] OR "grafting"[All Fields])) AND ("loattrfull text"[sb] AND "humans"[MeSH Terms])
